# Supplementary material
Source: Springer Nature journal article supplement (https://www.springermedizin.de/resource/supplementary/12889_2009_2170_MOESM2_ESM.pdf/9484832)

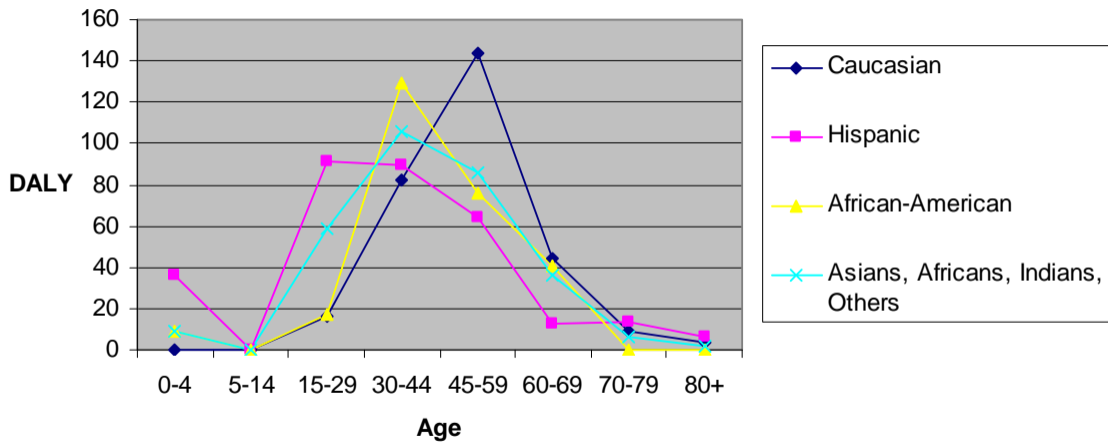

Supplement: MOESM2 [file 9484832]
